# Supplementary material for: High-Resolution Patterning of Organic Emitting-Layer by Using Inkjet Printing and Sublimation Transfer Process
Source: MDPI journal article supplement (doi:10.3390/nano12091611), 2022-05-09
Supplement: s1 [file s1]

**Table S1.** Properties of organic solvents that are used for the production of co-solvented ink.

| Solvents                       | Boiling Point<br>(°C) | Viscosity = $\gamma$<br>(g/cm s) | Surface Tension =<br>$\mu$ (g/s <sup>2</sup> ) | Density = $\rho$<br>(g/cm <sup>3</sup> ) | Vapor Pressure<br>(cmHg) |
|--------------------------------|-----------------------|----------------------------------|------------------------------------------------|------------------------------------------|--------------------------|
| Chlorobenzene (CB)[1]          | 131.7                 | 0.0073                           | 23.93                                          | 1.11                                     | 0.88                     |
| 1,2-Dichlorobenzene (oDCB)[2]  | 180.5                 | 0.01322                          | 36.63                                          | 1.306                                    | 0.136                    |
| N,N-dimethylformamide (DMF)[3] | 153                   | 0.0092                           | 36.5                                           | 0.948                                    | 0.4208                   |

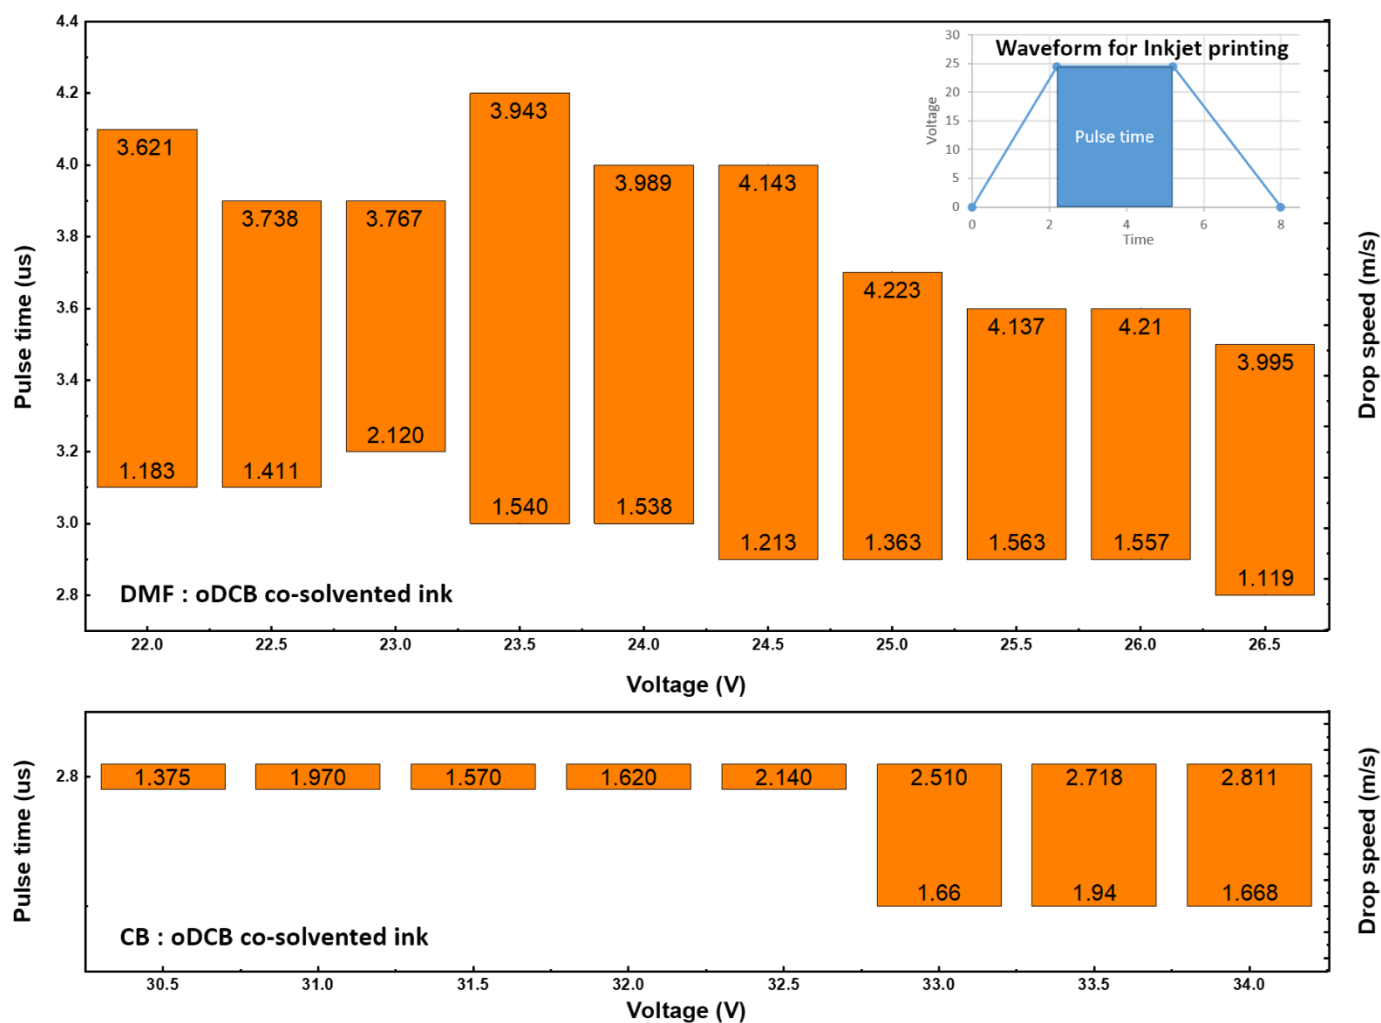

**Figure S1.** Printable region and drop speed of co-solvented inks by controlling the pulse time and voltage of the waveform.

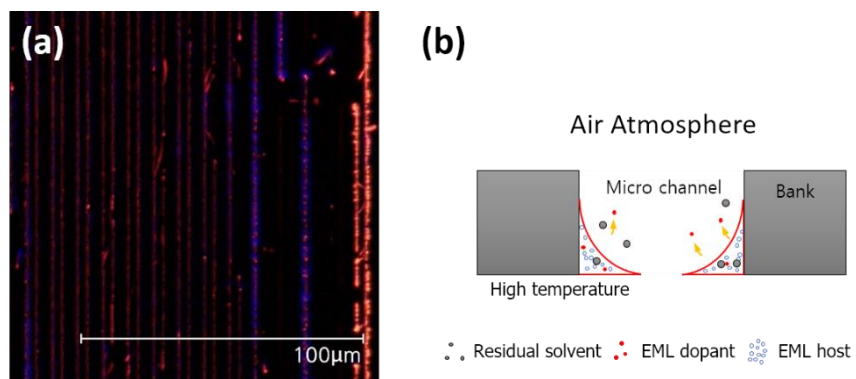

**Figure S2.** (a) Optical microscope images with UV exposure of inkjet-printed onto the microchannel that is drying in an air atmosphere at 80 °C for 20 minutes. (b) Schematic diagram of the residual solvents breaking out the pattern from the microchannel.

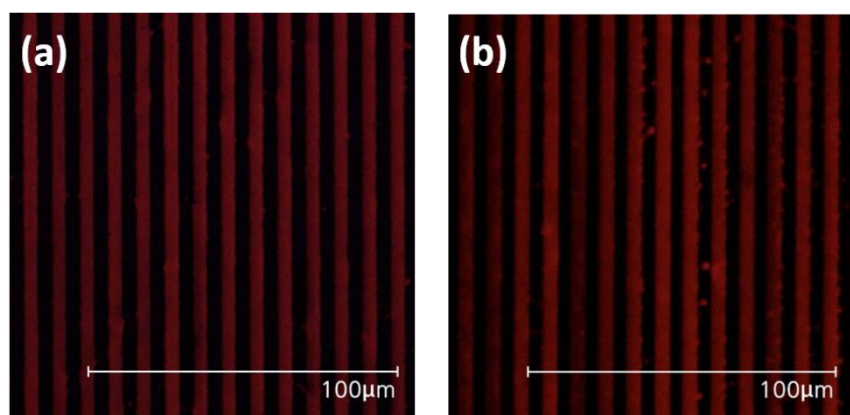

**Figure S3.** Optical microscope images of sublimation transferred patterns with UV exposure according to drying **(a)** in a vacuum chamber and **(b)** in an air atmosphere at room temperature.

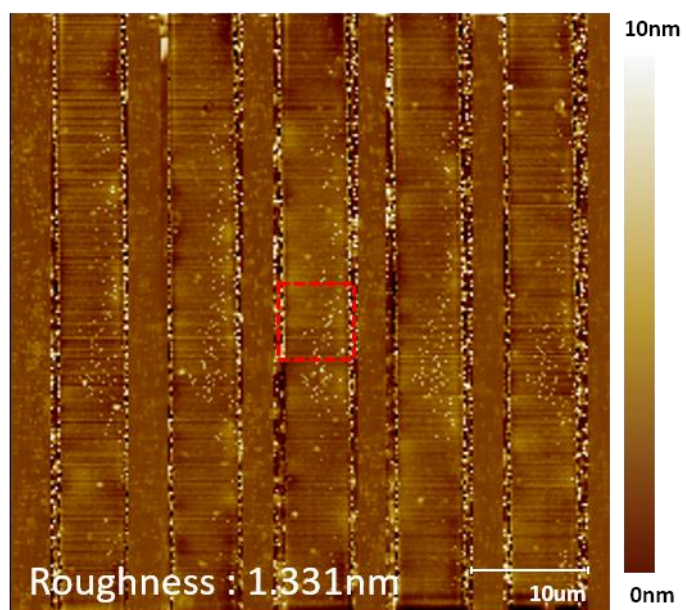

**Figure S4.** AFM images of sublimation transferred patterns after the drying process at room temperature after the flattening process. The marked area on the pattern was used for roughness calculation.

**Table S2.** Characteristics of the sublimation transferred patterns according to the dry conditions of inkjet-printed patterns in microchannel.

| Drying Condition                 | Air atmosphere                            |                                              | Vacuum Condition                                                  |                                                  |
|----------------------------------|-------------------------------------------|----------------------------------------------|-------------------------------------------------------------------|--------------------------------------------------|
|                                  | Without Heating                           | With Heating                                 | Without Heating                                                   | With Heating                                     |
| Inkjet-printed in micro-channels | Not fully evaporation of residual solvent | Break and separate out from the microchannel | Fully evaporation of residual solvent and having smooth roughness | Coarse surface roughness due to fast evaporation |
| Sublimation transferred pattern  | Voids & coarse roughness                  | Pattern not formed                           | Fine patterns and smooth roughness                                | Voids & coarse roughness                         |

## References

1. Rankin, D.W.H. CRC Handbook of Chemistry and Physics, 89th Edition, Edited by David R. Lide. *Crystallography Reviews* **2009**, 15, 223–224, doi:10.1080/08893110902764125.
2. National Center for Biotechnology Information (2022). PubChem Compound Summary for CID 7239, 1,2-Dichlorobenzene Available online: [https://pubchem.ncbi.nlm.nih.gov/compound/1\\_2-Dichlorobenzene](https://pubchem.ncbi.nlm.nih.gov/compound/1_2-Dichlorobenzene) (accessed on 28 March 2022).
3. National Center for Biotechnology Information (2022). PubChem Compound Summary for CID 6228, N,N-Dimethylformamide Available online: [https://pubchem.ncbi.nlm.nih.gov/compound/N\\_N-dimethylformamide](https://pubchem.ncbi.nlm.nih.gov/compound/N_N-dimethylformamide) (accessed on 28 March 2022).
